# Supplementary material
Source: MDPI journal article supplement (https://www.mdpi.com/2077-0472/6/1/6)
Supplement: s1 [file s1]

# Supplementary Materials: Microarray-Based Screening of Differentially Expressed Genes of *E. coli* O157:H7 Sakai during Preharvest Survival on Butterhead Lettuce

Inge Van der Linden, Bart Cottyn, Mieke Uyttendaele, Geertrui Vlaemynck, Marc Heyndrickx, Martine Maes and Nicola Holden

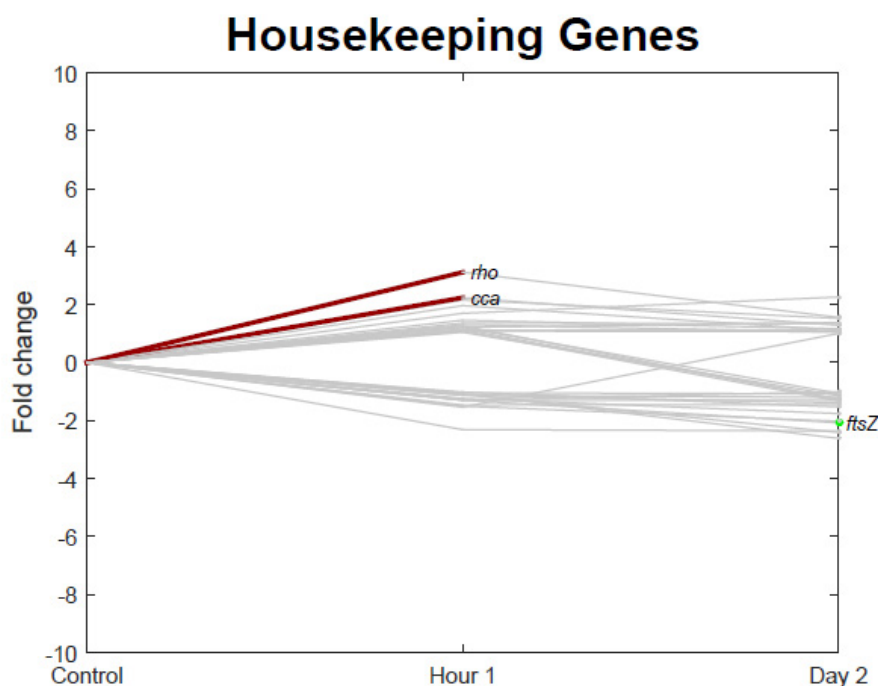

**Figure S1.** Relative expression of *E. coli* O157:H7 Sakai housekeeping genes as determined by Rocha *et al.* (2015) and Zhou *et al.* (2011) [1,2]. A colored line between the control and hour 1 shows that a particular gene was significantly differently expressed one hour after inoculation on the lettuce in comparison with the inoculum. A colored line between hour 1 and day 2 shows that the gene expression of a particular gene was significantly different between these two time points. Colored dots at day 2 show the genes which were significantly differently expressed on day 2 in comparison with the control. Light green: downregulation at  $0.01 \leq P < 0.05$ , dark green: downregulation at  $P < 0.01$ , light red: upregulation at  $0.01 \leq P < 0.05$ , dark red: upregulation at  $P < 0.01$ . Grey: no significant difference in expression. Data represent the mean of four biological replicates.

**Table S1.** List of 31 housekeeping genes as determined by Rocha *et al.* (2015) [1] and Zhou *et al.* (2011) [2] used for Figure S1.

| Primary Accession | Gene Name   |
|-------------------|-------------|
| b0095             | <i>ftsZ</i> |
| b0098             | <i>secA</i> |
| b0427             | <i>yajR</i> |
| b0474             | <i>adk</i>  |
| b0912             | <i>ihfB</i> |
| b2231             | <i>gyrA</i> |
| b2519             | <i>pbpC</i> |
| b2536             | <i>hcaT</i> |
| b2566             | <i>era</i>  |
| b2699             | <i>recA</i> |
| b3009             | <i>yghB</i> |
| b3056             | <i>cca</i>  |
| b3064             | <i>ygjD</i> |
| b3066             | <i>dnaG</i> |
| b3067             | <i>rpoD</i> |
| b3281             | <i>aroE</i> |
| b3295             | <i>rpoA</i> |
| b3368             | <i>cysG</i> |
| b3449             | <i>ugpQ</i> |
| b3648             | <i>gmk</i>  |
| b3699             | <i>gyrB</i> |
| b3744             | <i>asnA</i> |
| b3783             | <i>rho</i>  |
| b3940             | <i>metL</i> |
| b3952             | <i>pflC</i> |
| b3987             | <i>rpoB</i> |
| b3988             | <i>rpoC</i> |
| b4323             | <i>uxuB</i> |
| b4324             | <i>uxuR</i> |
| ECs4190           | <i>tuf</i>  |

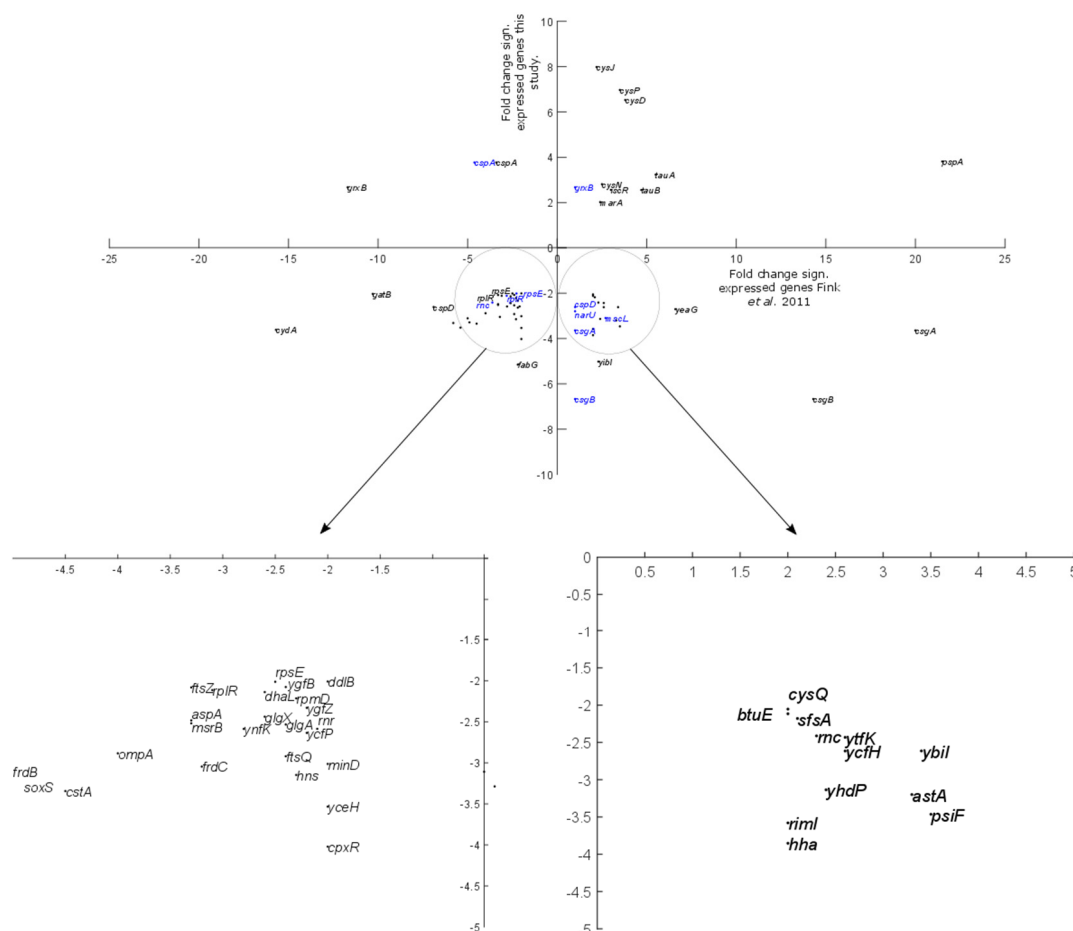

**Figure S2.** Scatterplot of common significantly differently regulated genes in this study and the study of Fink *et al.* (2012) [3]. The data of table 5 in Fink *et al.* for *E. coli* O157 genes ( $p < 0.01$ ) and the supplemental table 1 for *E. coli* K12 ( $p < 0.05$ ) were compared with the significantly regulated genes at day 2 in this study ( $p < 0.05$ ). The comparison was based on gene name. The *E. coli* O157 comparison is plotted in blue and the K12 comparison in black. Detail figures for the K12 comparison were made.

## References

1. Rocha, D.J.; Santos, C.S.; Pacheco, L.G. Bacterial reference genes for gene expression studies by RT-qPCR: Survey and analysis. *Antonie Van Leeuwenhoek* **2015**, *108*, 685–693.
2. Zhou, K.; Zhou, L.; Lim, Q.E.; Zou, R.; Stephanopoulos, G.; Too, H.-P. Novel reference genes for quantifying transcriptional responses of *Escherichia coli* to protein overexpression by quantitative PCR. *BMC Mol. Biol.* **2011**, doi: 10.1186/1471-2199-12-18.
3. Fink, R.C.; Black, E.P.; Hou, Z.; Sugawara, M.; Sadowsky, M.J.; Diez-Gonzalez, F. Transcriptional responses of *Escherichia coli* K-12 and O157:H7 associated with lettuce leaves. *Appl. Environ. Microbiol.* **2012**, *78*, 1752–1764.

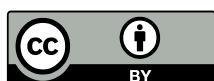

© 2015 by the authors; licensee MDPI, Basel, Switzerland. This article is an open access article distributed under the terms and conditions of the Creative Commons by Attribution (CC-BY) license (<http://creativecommons.org/licenses/by/4.0/>).
